# Supplementary material for: Study on Molecular Recognition between Euphorbia Factor L713283 and β ‐Tubulin via Molecular Simulation Methods
Source: Hindawi journal article supplement (doi:10.1155/2015/879238), 2015-01-01
Supplement: f1 [file 879238.f1.pdf]

## Supplemental Material:

### FIGURES:

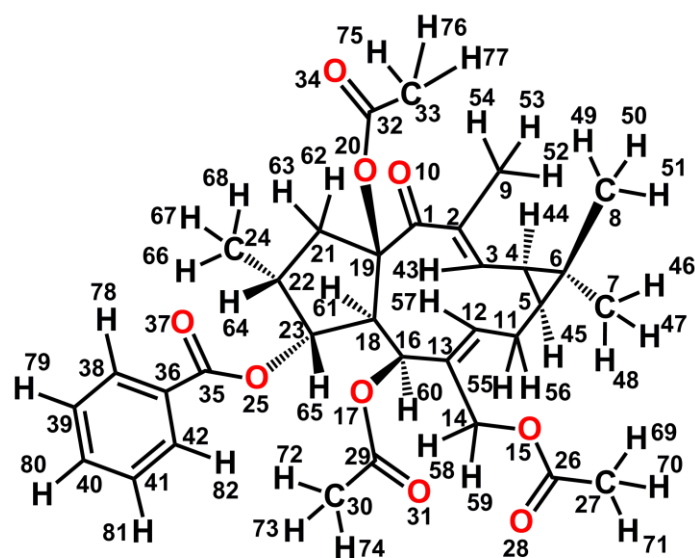

FIGURE S1: The structure of L713283 with atomic number.

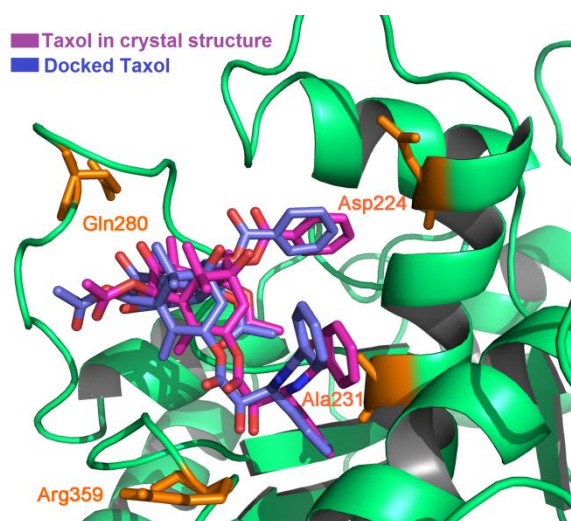

FIGURE S2: Superimposition between 1JFF crystal structure and the re-docked model of Taxol molecule with  $\beta$ -tubulin.

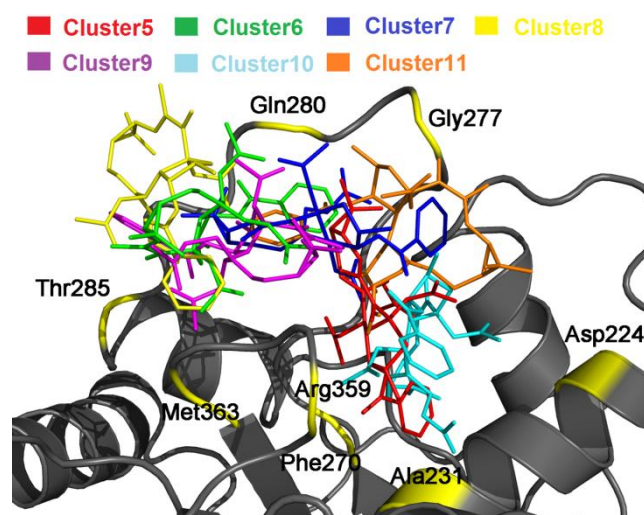

FIGURE S3: The binding modes of  $\beta$ -tubulin with the representative conformation of L713283 in the 5th~11th cluster, which are shown in red, green, blue, yellow, violet, cyan, orange, respectively.

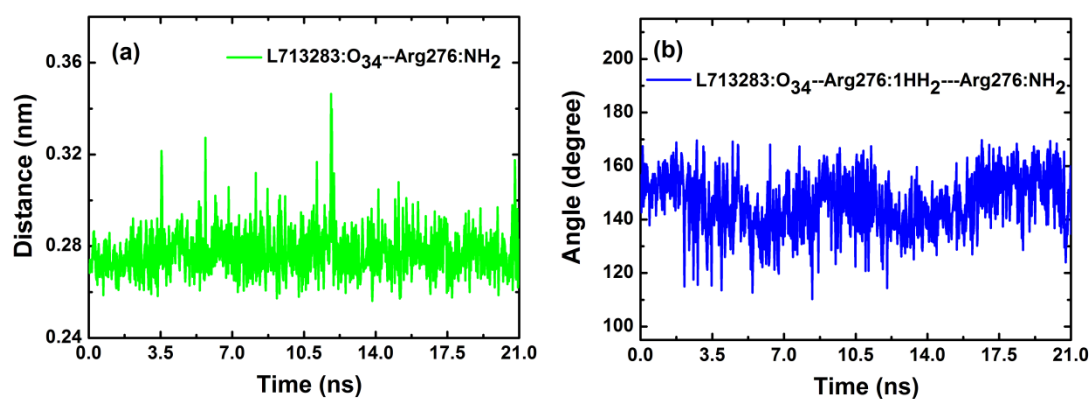

FIGURE S4: The geometry parameter for the hydrogen bond between L713283 and  $\beta$ -tubulin. (A) Distance of donor atom with acceptor atom. (B) Angle of donor atom, hydrogen atom and acceptor atom.
